# Supplementary material for: Quantification of residual liquid on repellent cotton fabrics after liquid roll off
Source: Royal Society of Chemistry journal article supplement (doi:10.1039/c5ra20782g), 2015-01-01
Supplement: c5ra20782g1.pdf [file c5ra20782g1.pdf]

## Supporting Information

### Quantification of Residual Liquid on Repellent Cotton Fabrics after Liquid Roll Off

Claudia M. Grozea, Muhammad Rabnawaz, and Guojun Liu\*

Department of Chemistry, Queen's University, 90 Bader Lane, Kingston, Ontario, Canada K7L

3N6. E-mail: guojun.liu@chem.queensu.ca; Tel: +1 613-533-6996

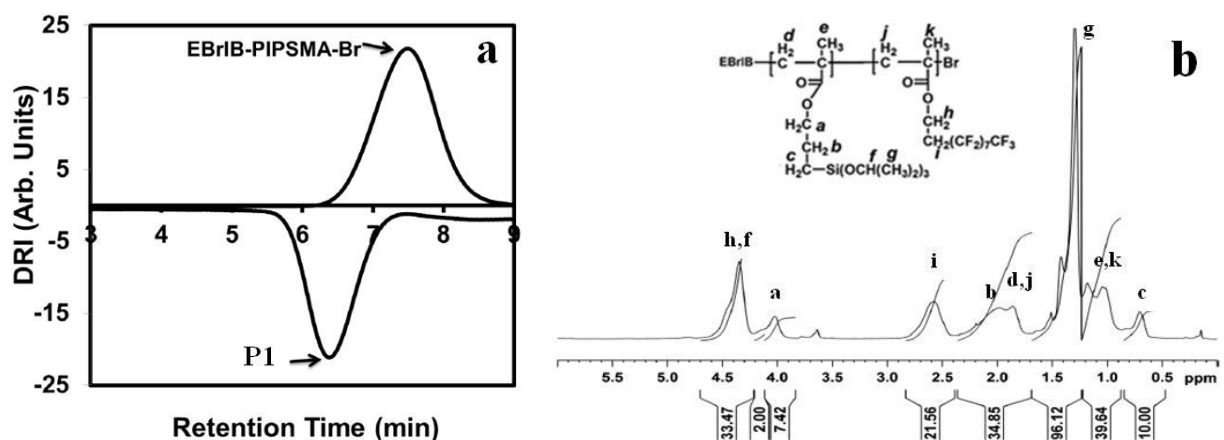

Figure S1. PIPSMA<sub>15</sub>-*b*-PFOEMA<sub>31</sub> (P1) (a) SEC trace and (b) <sup>1</sup>H NMR.<sup>1</sup>

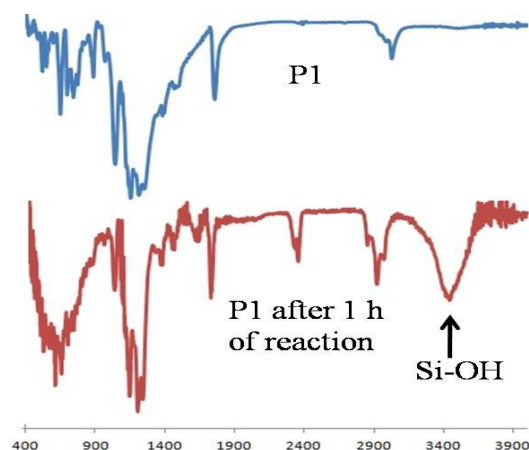

Figure S2. FTIR spectra of P1 before and after 1 h of sol-gel reaction. The peak at 3500 cm<sup>-1</sup> present in the spectra of the reacted polymer corresponds to the silanol groups indicative of P1 undergoing a hydrolysis reaction.<sup>2</sup>

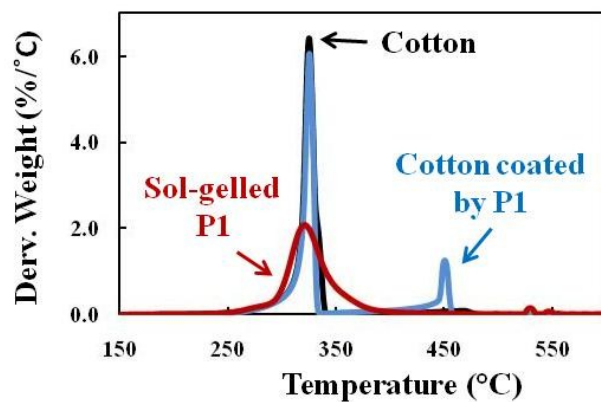

**Figure S3.** DTGA traces for cotton fabric, sol-gelled P1, and coated cotton at a P1 concentration of 5.00 mg/mL.

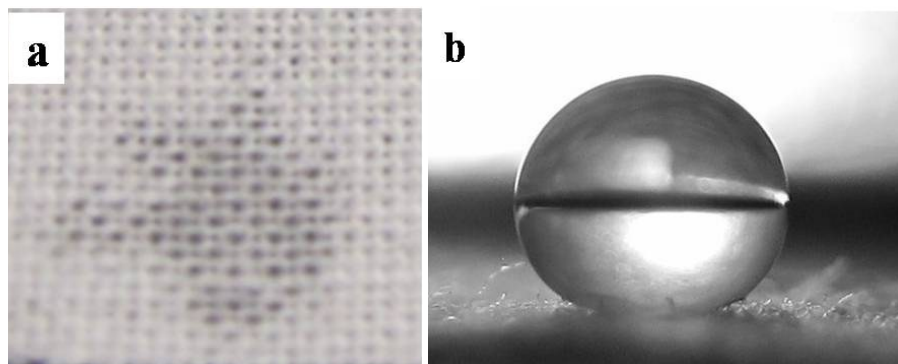

**Figure S4.** Photographs of 5.0  $\mu\text{L}$  water droplets on (a) uncoated cotton (top view), and (b) coated cotton at a P1 concentration of 5.00 mg/mL (side view).

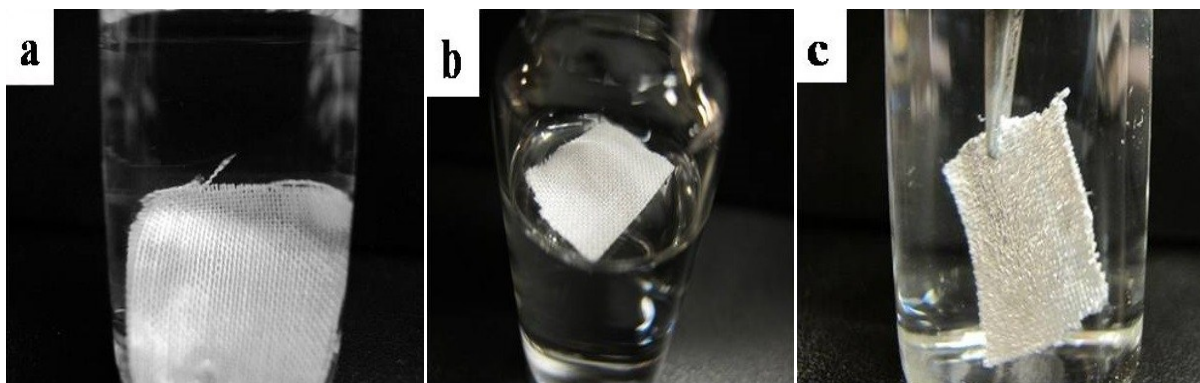

**Figure S5.** Photographs of (a) uncoated cotton, and (b) coated cotton at a P1 concentration of 5.00 mg/mL in a vial with water, and (c) same coated cotton piece forcibly submerged into the water. The coated cotton shows a plastron layer.

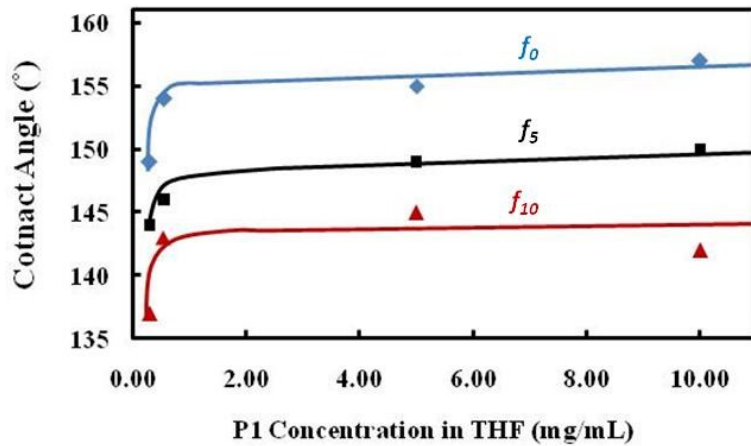

**Figure S6.** Changes in static contact angles for 5.0  $\mu\text{L}$  droplets of  $f_0$ ,  $f_5$ , and  $f_{10}$  loaded with QD at a 4.0 mg/mL concentration on coated cotton fabrics at different P1 concentrations.

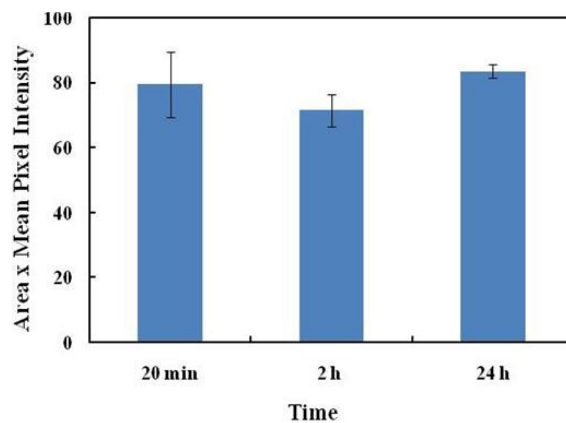

**Figure S7.** QD fluorescence intensity as a function of time for coated cotton fabrics at a P1 concentration of 5.00 mg/mL.

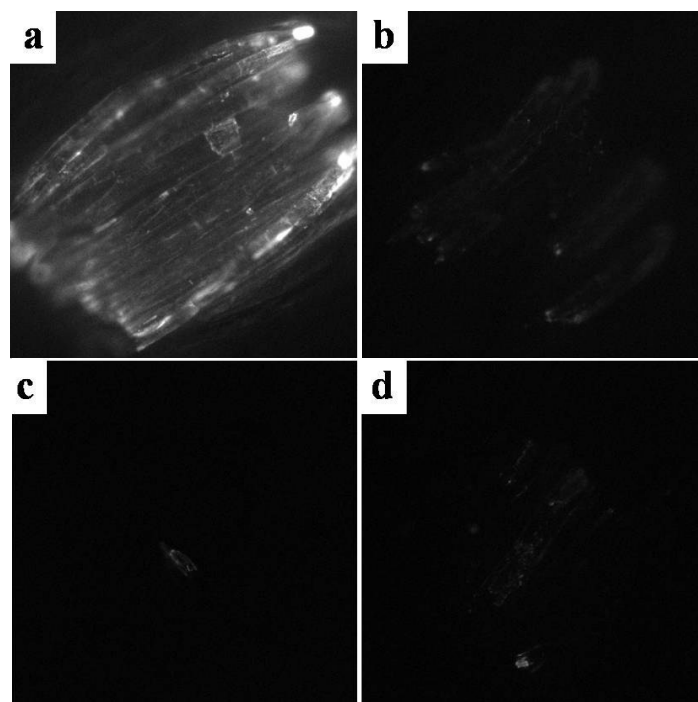

**Figure S8.** Fluorescence images of fabrics slanted at  $60^\circ$  after roll off of QD-containing  $f_5$ . The fabrics were coated at a P1 concentration of (a) 0.30, (b) 0.55, (c) 5.00, and (d) 10.00 mg/mL. Images were cropped to  $0.27 \times 0.27 \text{ mm}^2$ .

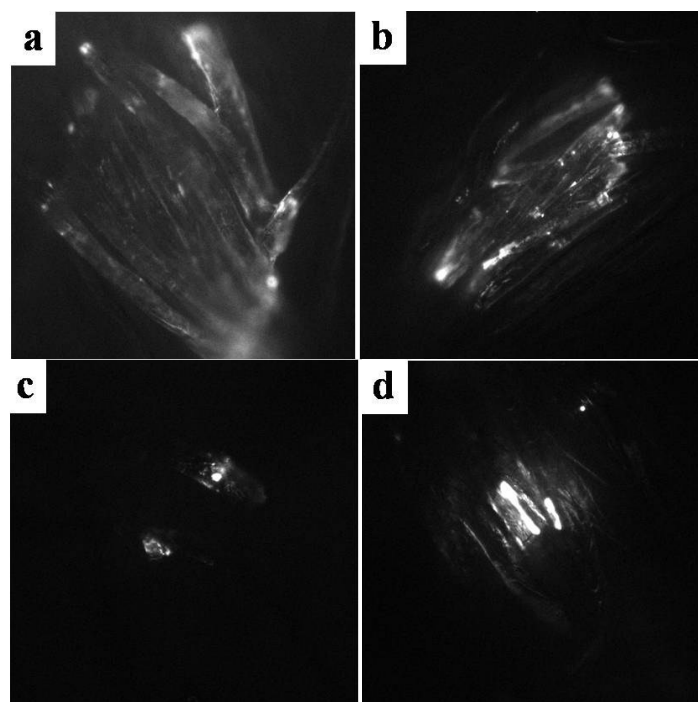

**Figure S9.** Fluorescence images of fabrics slanted at  $60^\circ$  after roll off of QD-containing  $f_{10}$ . The fabrics were coated at a P1 concentration of (a) 0.30, (b) 0.55, (c) 5.00, and (d) 10.00 mg/mL. Images were cropped to  $0.27 \times 0.27 \text{ mm}^2$ .

**Table S1.** Amount of residual liquid left behind on fabrics slanted at 60 ° after roll off using 10.0  $\mu\text{L}$  droplets containing  $4.0 \times 10^{-2}$  mg QD.

| P1 Concentration in THF (mg/mL) | $f_0$ (mg)                     | $f_5$ (mg)                     | $f_{10}$ (mg)                  |
|---------------------------------|--------------------------------|--------------------------------|--------------------------------|
| 0.30                            | $(8 \pm 5) \times 10^{-4}$     | $(4 \pm 1) \times 10^{-3}$     | $(2.4 \pm 0.8) \times 10^{-2}$ |
| 0.55                            | $(2 \pm 1) \times 10^{-5}$     | $(1.2 \pm 0.2) \times 10^{-4}$ | $(4 \pm 1) \times 10^{-3}$     |
| 5.0                             | $(2.0 \pm 0.4) \times 10^{-6}$ | $(9 \pm 5) \times 10^{-6}$     | $(3.1 \pm 8) \times 10^{-4}$   |
| 10.0                            | $(1.9 \pm 0.4) \times 10^{-6}$ | $(2.1 \pm 0.3) \times 10^{-4}$ | $(1.4 \pm 4) \times 10^{-3}$   |

**Table S2.** Percent of residual liquid left behind on fabrics slanted at 60 ° after roll off of using 10.0  $\mu\text{L}$  droplets containing  $4.0 \times 10^{-2}$  mg QD.

| P1 Concentration in THF (mg/mL) | $f_0$ (%)         | $f_5$ (%)       | $f_{10}$ (%)  |
|---------------------------------|-------------------|-----------------|---------------|
| 0.30                            | $2 \pm 1$         | $10 \pm 4$      | $60 \pm 19$   |
| 0.55                            | $0.06 \pm 0.03$   | $0.31 \pm 0.06$ | $10 \pm 3$    |
| 5.0                             | $0.005 \pm 0.001$ | $0.02 \pm 0.01$ | $0.8 \pm 0.2$ |
| 10.0                            | $0.005 \pm 0.001$ | $0.53 \pm 0.08$ | $3 \pm 1$     |

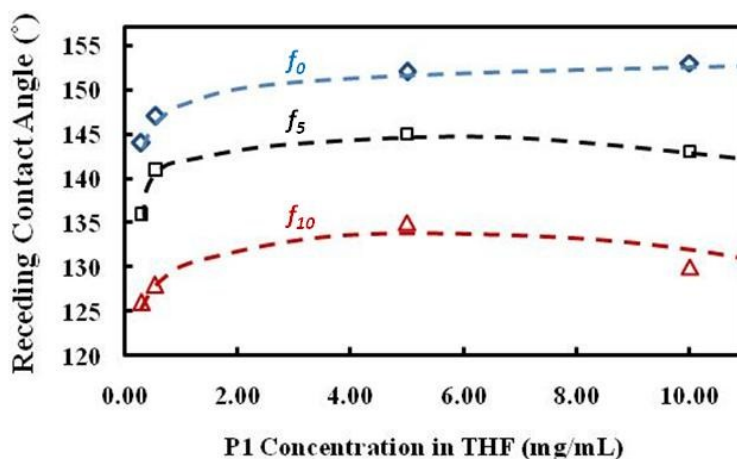

**Figure S10.** Changes in receding contact angles for 5.0  $\mu\text{L}$  droplets of  $f_0$ ,  $f_5$ , and  $f_{10}$  on coated cotton fabrics at different P1 concentrations.

## References

1. C. M. Grozea, M. Rabnawaz, G. Liu and G. Zhang, *Polymer*, 2015, **64**, 153-162.
2. B. H. Stuart, *Infrared spectroscopy: fundamentals and applications*, John Wiley & Sons, Chichester, UK, 2004.
